# Supplementary material for: Gene expression in lungs of mice lacking the 5-hydroxytryptamine transporter gene
Source: PubMed Central journal article supplement (PMC2688484; doi:10.1186/1471-2466-9-19), 2009-05-10
Supplement: 1471-2466-9-19-S1.pdf [file 1471-2466-9-19-S1.pdf]

Table 1: Primer Sequences

| <b>Gene</b> | <b>Forward</b>             | <b>Reverse</b>        | <b>Product</b> |
|-------------|----------------------------|-----------------------|----------------|
| Cebbp       | AAGAGCCGCGACAAGGC          | GGCAGCTGCTTGAACAAGTTC | 146            |
| Il1b        | CGTGGACCTTCCAGGATGAG       | AATGGGAACGTCACACACCAG | 119            |
| Kcne4       | AGCAGTGGTAATGGCAATGAATAC   | CATGTAGCCCAGCATGATTCC | 90             |
| Klf4        | GGCTGTGGGTGGAAATTCG        | CGCACTTCTGGCACTGAAAG  | 91             |
| Klf9        | CCTCCCATCTTAAAGCCCATTAC    | TCATCCGAGCGCGAGAAC    | 97             |
| Mmp9        | CAGGAGTCTGGATAAGTTGGGTCTAG | ACGCCCTTGCTGAACAG     | 100            |
| S100A8      | CCATGCCCTCTACAAGAATG       | ATCACCATCGCAAGGAACTC  | 150            |
